# Supplementary material
Source: Research Square preprint supplement (doi:10.21203/rs.3.rs-9404223/v1)
Supplement: Supplementary file 1 [file 296f185f6af9b6e651d7f4fb.docx]

****Supplementary Table S1. Odds ratios (95% CI) for depression across progressively adjusted models (Model 1 to Model 5)****

Table 2. Odds Ratios (95% CI) for Depression Across Progressively Adjusted Models (N=8,406)

| Variables | M1 (Unadjusted) | M2 (+Demographics) | M3 (+Socio-econ) | M4 (+Health) | M5 (Full Model) |
| --- | --- | --- | --- | --- | --- |
| Activity Limitation (Yes) | 2.263 (1.924–2.662)*** | 1.748 (1.474–2.072)*** | 1.748 (1.475–2.073)*** | 1.302 (1.088–1.558)** | 1.347 (1.118–1.624)** |
| Socio-demographics |  |  |  |  |  |
| Age | - | 1.022 (1.016–1.029)*** | 1.025 (1.016–1.033)*** | 1.015 (1.005–1.024)** | 1.017 (1.007–1.026)*** |
| Gender (Male) | - | 0.583 (0.522–0.652)*** | 0.581 (0.520–0.649)*** | 0.612 (0.546–0.687)*** | 0.631 (0.540–0.738)*** |
| Residence (Rural) | - | 1.591 (1.414–1.791)*** | 1.576 (1.398–1.776)*** | 1.454 (1.286–1.643)*** | 1.453 (1.284–1.646)*** |
| Married (Yes) | - | 0.944 (0.789–1.129) | 0.945 (0.789–1.131) | 0.930 (0.775–1.117) | 0.979 (0.777–1.235) |
| Retired (Yes) | - | 0.737 (0.619–0.877)** | 0.752 (0.630–0.897)** | 0.789 (0.659–0.945)** | 0.800 (0.663–0.966)* |
| Education (Ref: < Primary) |  |  |  |  |  |
| Primary school | - | 0.795 (0.694–0.909)** | 0.794 (0.694–0.909)** | 0.923 (0.797–1.068) | 0.929 (0.801–1.077) |
| Middle school | - | 0.767 (0.660–0.893)** | 0.766 (0.658–0.891)** | 0.911 (0.772–1.075) | 0.911 (0.768–1.080) |
| High school & above | - | 0.565 (0.462–0.690)*** | 0.571 (0.467–0.699)*** | 0.747 (0.601–0.929)** | 0.732 (0.585–0.915)** |
| Socio-economics |  |  |  |  |  |
| Consumption (hhcperc) | - | - | 1.000 (1.000–1.000) | 1.000 (1.000–1.000) | 1.000 (1.000–1.000) |
| Medical Insurance (Yes) | - | - | 1.028 (0.734–1.440) | 0.949 (0.674–1.338) | 0.949 (0.670–1.343) |
| Pension Insurance (Yes) | - | - | 0.925 (0.782–1.094) | 0.956 (0.803–1.137) | 0.969 (0.814–1.153) |
| Health Status |  |  |  |  |  |
| Physical disability (Yes) | - | - | - | 1.050 (0.867–1.273) | 1.040 (0.856–1.264) |
| Chronic disease counts | - | - | - | 1.052 (0.992–1.116) | 1.063 (1.001–1.129)* |
| Cognition score | - | - | - | 0.936 (0.916–0.956)*** | 0.933 (0.913–0.954)*** |
| Body Pain (Ref: None) |  |  |  |  |  |
| A little | - | - | - | 1.307 (1.150–1.486)*** | 1.275 (1.120–1.451)*** |
| Somewhat | - | - | - | 1.627 (1.352–1.957)*** | 1.542 (1.279–1.861)*** |
| Quite a bit | - | - | - | 1.963 (1.578–2.442)*** | 1.835 (1.470–2.289)*** |
| Very much | - | - | - | 2.167 (1.657–2.833)*** | 2.057 (1.565–2.704)*** |
| Self-rated health (Ref: V. Poor) |  |  |  |  |  |
| Poor | - | - | - | 0.861 (0.615–1.206) | 0.860 (0.610–1.212) |
| Fair | - | - | - | 0.641 (0.465–0.885)** | 0.646 (0.465–0.897)** |
| Good | - | - | - | 0.413 (0.290–0.589)*** | 0.419 (0.292–0.600)*** |
| Excellent | - | - | - | 0.418 (0.293–0.596)*** | 0.439 (0.305–0.631)*** |
| Lifestyle & Social Support |  |  |  |  |  |
| Smoking (Current/Former) | - | - | - | - | 0.755 (0.517–1.100) |
| Drinking (Current/Former) | - | - | - | - | 1.091 (0.895–1.325) |
| Regular Exercise (Yes) | - | - | - | - | 1.263 (1.001–1.592)* |
| Sleep duration (hours) | - | - | - | - | 0.914 (0.885–0.943)*** |
| Living Alone (Yes) | - | - | - | - | 1.043 (0.815–1.334) |
| Social Frequency (Weekly+) | - | - | - | - | 0.897 (0.745–1.098) |
| Child Contact (Annual+) | - | - | - | - | 1.445 (1.022–2.042)* |
| Financial Support (fcamt) | - | - | - | - | 0.999 (0.999–1.000)* |
